# Supplementary material for: Amphiphilic and double hydrophilic block copolymers containing a polydehydroalanine block
Source: Royal Society of Chemistry journal article supplement (doi:10.1039/c6py02076c), 2016-12-22
Supplement: c6py02076c1.pdf [file c6py02076c1.pdf]

## SUPPORTING INFORMATION

### **Amphiphilic and double hydrophilic block copolymers containing a polydehydroalanine block**

*Mark Billing,<sup>1,2</sup> Grit Festag,<sup>1</sup> Peter Bellstedt,<sup>1</sup> Felix H. Schacher<sup>\*1,2</sup>*

Laboratory of Organic Chemistry and Macromolecular Chemistry, Friedrich-Schiller-

University Jena, Humboldtstraße 10, D-07743 Jena, Germany

Email: [felix.schacher@uni-jena.de](mailto:felix.schacher@uni-jena.de)

Jena Center for Soft Matter (JCSM), Friedrich-Schiller-University Jena, Philosophenweg 7,

D-07743 Jena, Germany

### ***Cleavage of the boc-group at RT / Cleavage of the methyl ester at 100 °C:***

Starting from  $PnBA_{25}$ - $b$ - $PtBAMA_{50}$ , cleavage of the boc protective group was carried out by adding TFA (10 eq. per monomer unit) in DCM at RT for 44 h. After purification (see deprotection at RT for 44 h), 20% remaining methyl ester was observed (**Figure S1**). The cleavage of the methyl ester at 100 °C for 22 h with 21 eq.  $LiOH \cdot H_2O$  ( $c = 60 \text{ g L}^{-1}$ , 1,4-dioxane/water 2/5 v/v) led to complete cleavage of the methyl ester and approximately 90 % of the butyl ester in  $PnBA$ , as observed by the remaining small signal at 0.95 ppm. Besides, the intensity of the *boc* protective group at 1.4 ppm strongly decreased as well, hinting toward a cleavage of 85%.

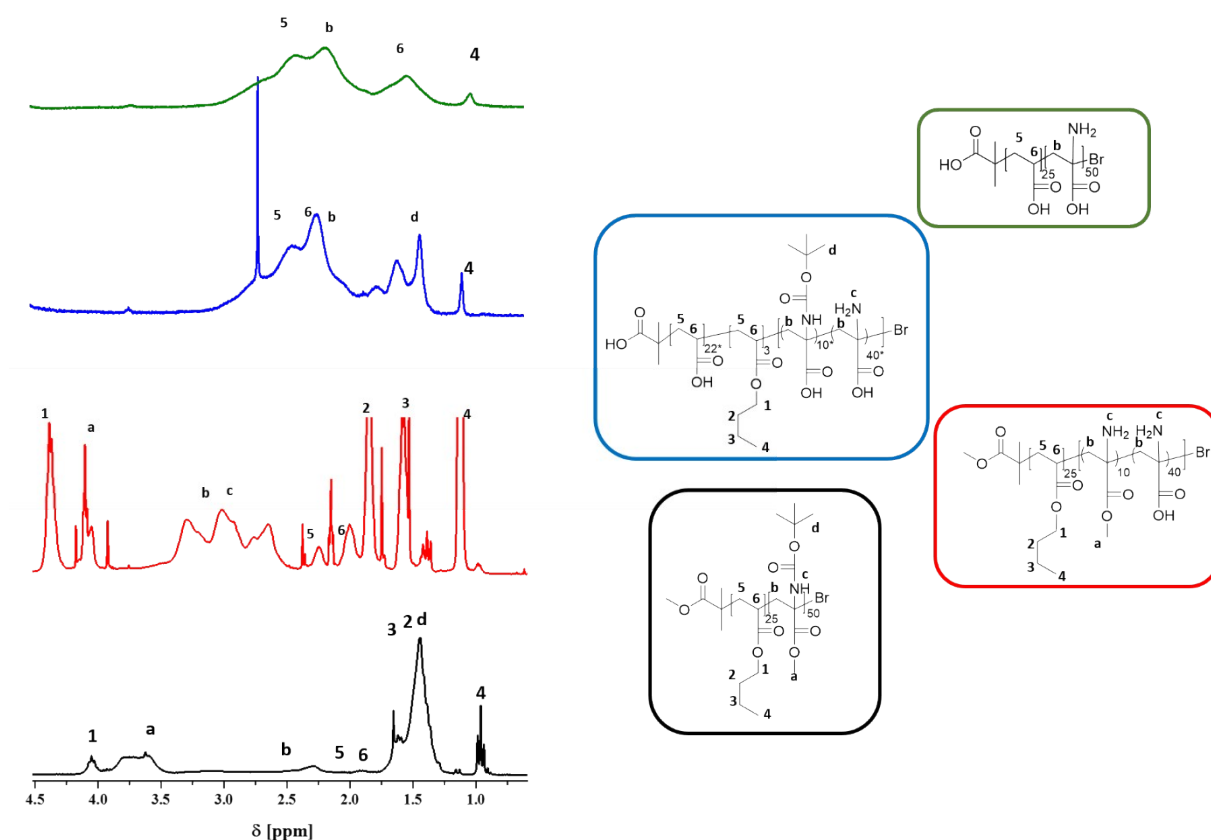

**Figure S1:**  $^1\text{H}$ -NMR of  $PnBA_{25}$ - $b$ - $PtBAMA_{50}$  (black line,  $\text{CDCl}_3$ ),  $PnBA_{25}$ - $b$ -( $\text{PAMA}_{10}$ - $co$ - $\text{PDha}_{35}$ ) (red line,  $d$ -TFA),  $\text{PAA}_{25}$ - $b$ -( $\text{PtBAA}_{20}$ - $co$ - $\text{PDha}_{30}$ ) (blue line,  $\text{D}_2\text{O}$ , subscripts are marked with \* to indicate estimated degrees of polymerizations due to an overlay of the signals),  $\text{PAA}_{25}$ - $b$ - $\text{PDha}_{50}$  (green line,  $\text{D}_2\text{O}$ ), numbers indicate signals of  $PnBA$ / $\text{PAA}$ , letters indicate signals of  $PtBAMA$ ,  $\text{PAMA}$ ,  $\text{PtBAA}$  and  $\text{PDha}$ .

$^{13}\text{C}$ -NMR spectroscopy results confirmed the results from  $^1\text{H}$ -NMR data (**Figure S2**). After cleavage of the boc group, signals of the methyl ester can be still detected (59 ppm). Due to

aggregation of PAA<sub>25</sub>-*b*-PtBAA<sub>50</sub> in diverse NMR solvents at higher concentrations, <sup>13</sup>C-NMR was conducted in the solid state. In this case, both the signals of the carbonyl groups and the methyl groups of the boc group can be detected. Signals for the methyl ester of PtBAMA as well as for the butyl ester of PnBA are missing.

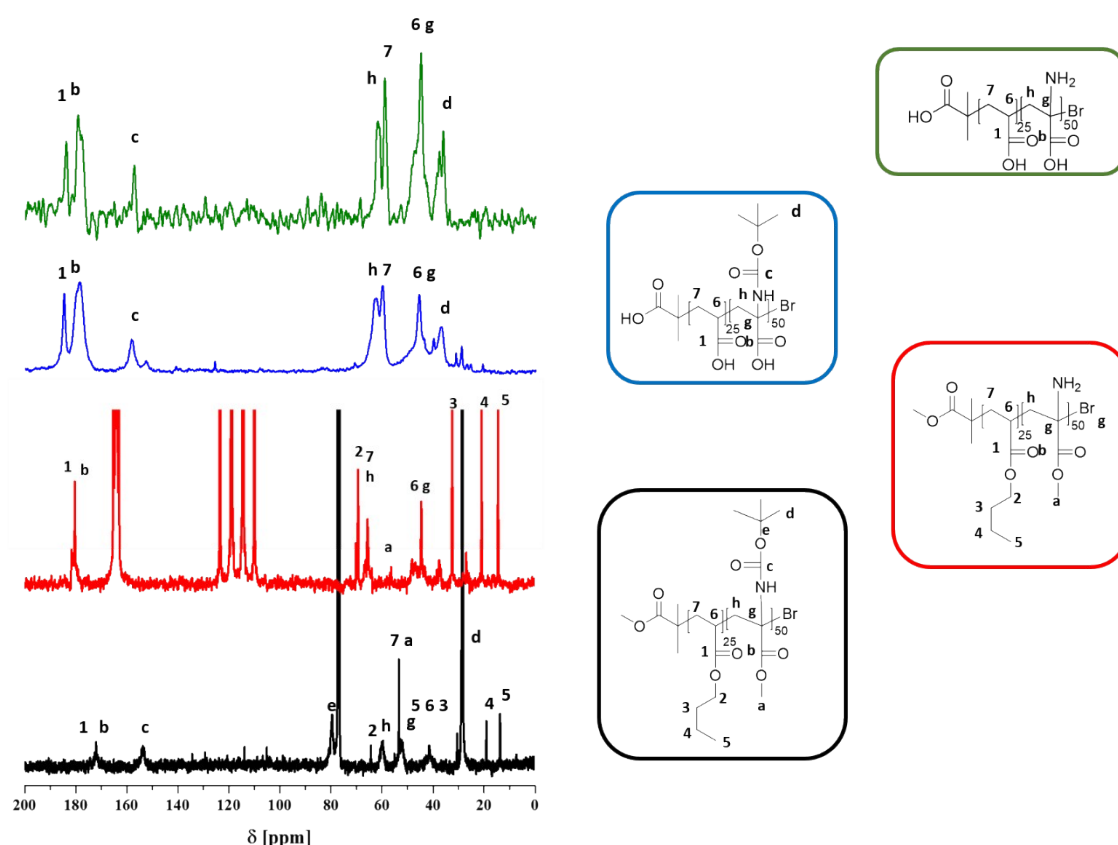

**Figure S2:** <sup>13</sup>C-NMR of PnBA<sub>25</sub>-*b*-PtBAMA<sub>50</sub> (black line, CDCl<sub>3</sub>), PnBA<sub>25</sub>-*b*-(PAMA<sub>10</sub>-*co*-PDha<sub>35</sub>) (red line, *d*-TFA), PAA<sub>25</sub>-*b*-(PtBAA<sub>20</sub>-*co*-PDha<sub>30</sub>) (blue line, D<sub>2</sub>O, subscripts are marked with \* to indicate estimated degrees of polymerizations due to an overlay of the signals), PAA<sub>25</sub>-*b*-PDha<sub>50</sub> (green line, D<sub>2</sub>O), numbers indicate signals of PnBA/PAA, letters indicate signals of PtBAMA, PAMA, PtBAA and PDha.

### ***Cleavage of the boc-group at 50 °C:***

If carried out at 50 °C, the cleavage of the *boc* group shows a slightly higher selectivity, leading to  $PnBA_{25}\text{-}b\text{-(PAMA}_{15}\text{-}co\text{-PDha}_{35})$  as observed by  $^1\text{H-NMR}$  in deuterated TFA (dissolving in DCM led to a turbid suspension). In DCM, only signals for the *PnBA* block (4.2, 2.3, 1.98, 1.6, 1.4 and 0.98 ppm) were detected (**Figure S3**) and confirmed by  $^{13}\text{C-NMR}$  (174, 64, 41, 35, 19 and 13 ppm, **Figure S4**). Upon dissolving the material in deuterated TFA, additional signals of the PAMA block (4.0 and 3 ppm) were detected.

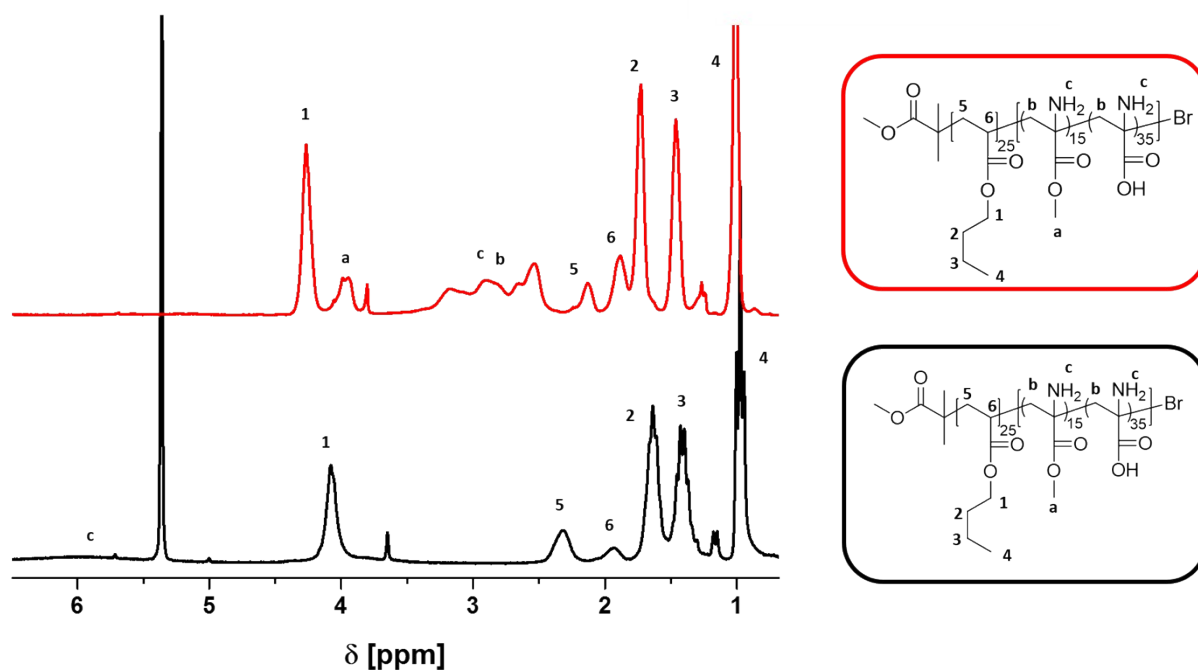

**Figure S3:**  $^1\text{H-NMR}$  of  $PnBA_{25}\text{-}b\text{-(PAMA}_{15}\text{-}co\text{-PDha}_{35})$  in TFA (red line) and dichloromethane (black line).

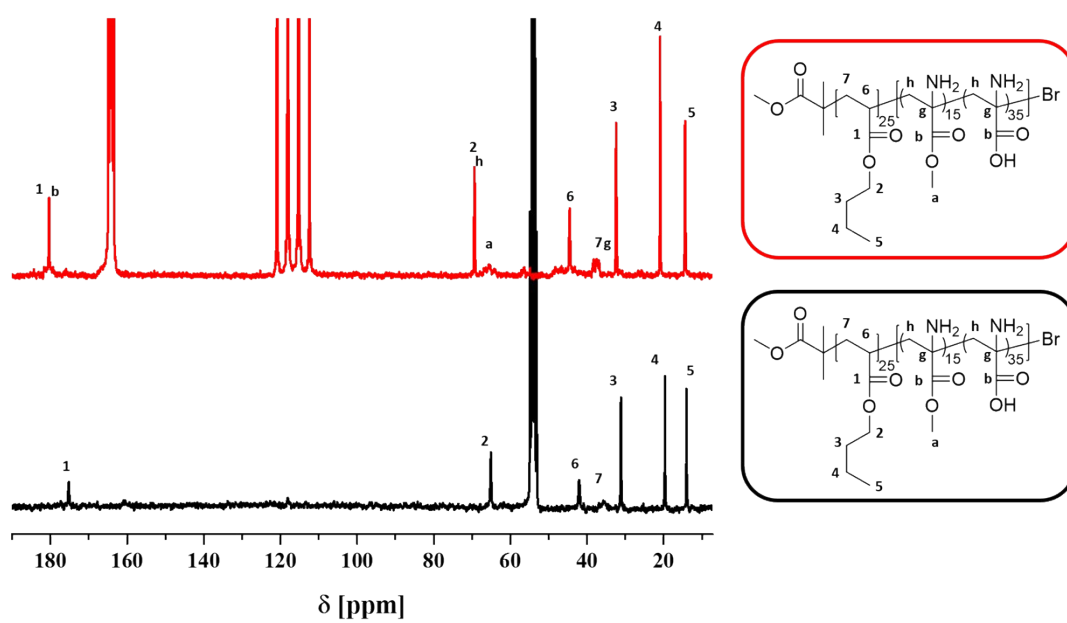

Figure S4:  $^{13}\text{C}$ -NMR of  $\text{PnBA}_{25}\text{-}b\text{-(PAMA}_{15}\text{-co-PDha}_{35})\text{A}$  in TFA (red line) and dichloromethane (black line).

### *Cleavage of the methyl ester at 80 °C:*

Also, a slightly higher selectivity was found if the cleavage of the methyl ester was carried out at 80 °C and with a lower amount of LiOH (21 eq) for 3 h. Also here, the obtained NMR spectra differed if being taken in deuterated TFA or D<sub>2</sub>O (**Figure S5**). Clearly, in D<sub>2</sub>O the boc group (1.4 ppm) can be detected, but also additional signals for PnBA at 4 ppm and 0.98 ppm, hinting to an incomplete deprotection. These results were confirmed in <sup>13</sup>C-NMR showing the methyl carbons of the boc group at 27 ppm and at 65, 30, 18 and 13 ppm carbon atoms of PnBA (**Figure S6**).

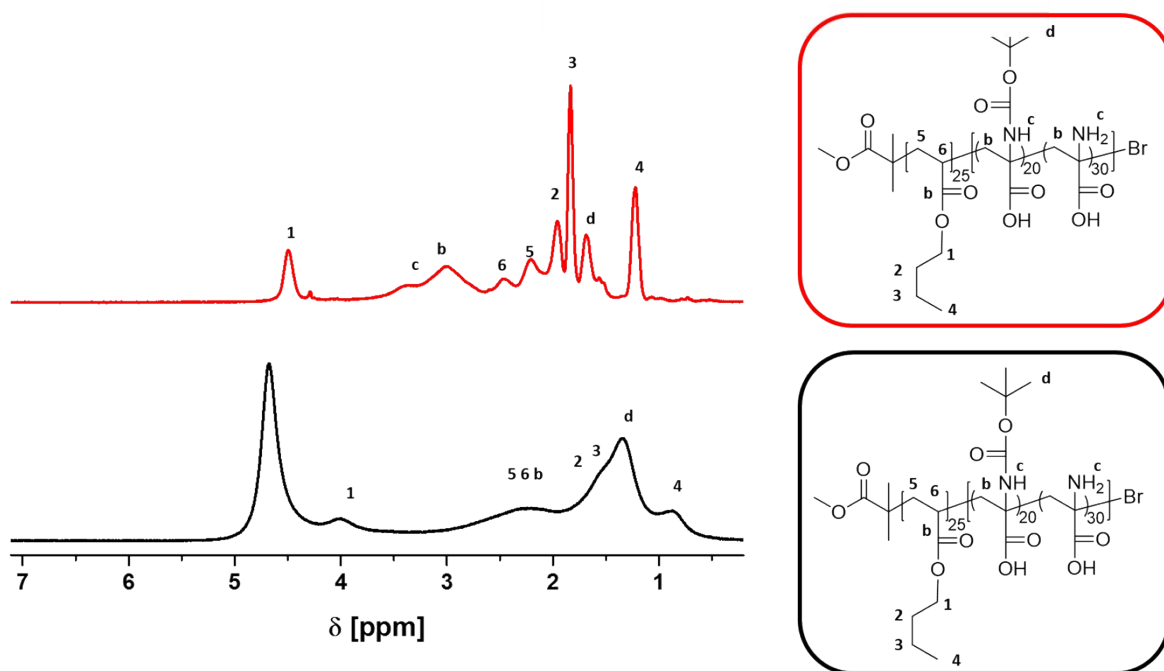

Figure S5: <sup>1</sup>H-NMR of PnBA<sub>25</sub>-b-(PtBAA<sub>20</sub>-co-PDha<sub>30</sub>) in TFA (red line) and D<sub>2</sub>O (black line).

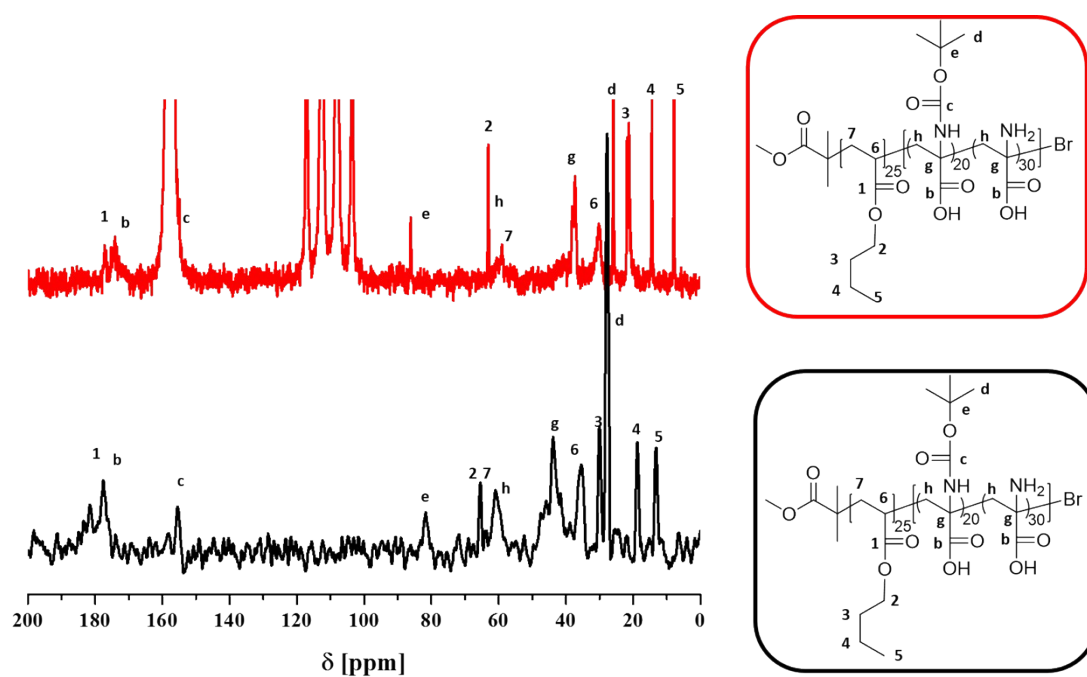

Figure S6:  $^{13}\text{C}$ -NMR of  $\text{PnBA}_{25}\text{-}b\text{-(PtBAA}_{20}\text{-co-PDha}_{30})$  in TFA (red line) and  $\text{D}_2\text{O}$  (black line).

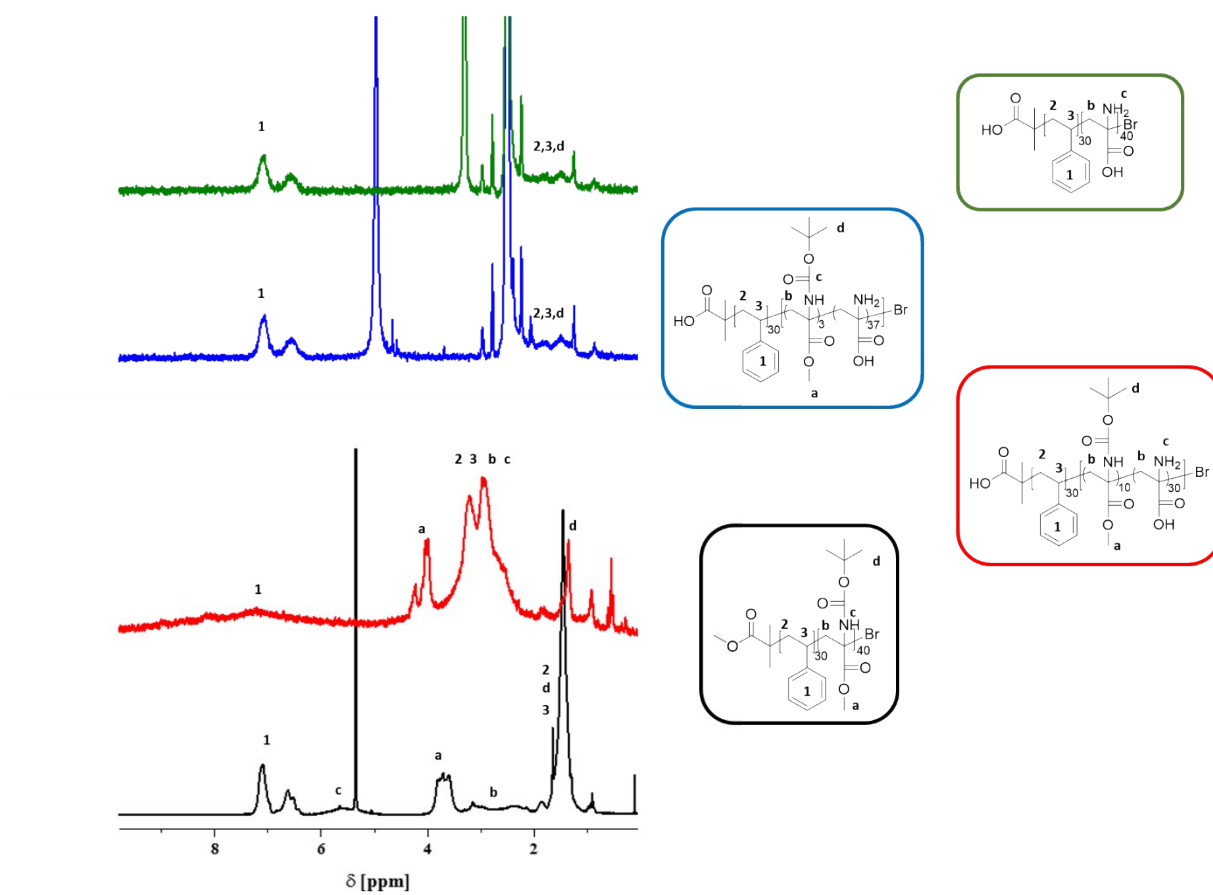

**Figure S7:**  $^1\text{H}$ -NMR of  $\text{PS}_{30}\text{-}b\text{-PtBAMA}_{40}$  (black line  $\text{CD}_2\text{Cl}_2$ ),  $\text{PS}_{30}\text{-}b\text{-}(\text{PAMA}_{10}\text{-}co\text{-PDha}_{30})$  (red line  $d\text{-TFA}$ ),  $\text{PS}_{30}\text{-}b\text{-}(\text{PtBAMA}_3\text{-}co\text{-PDha}_{37})$  (blue line DMSO),  $\text{PS}_{30}\text{-}b\text{-PDha}_{40}$  (green line DMSO).



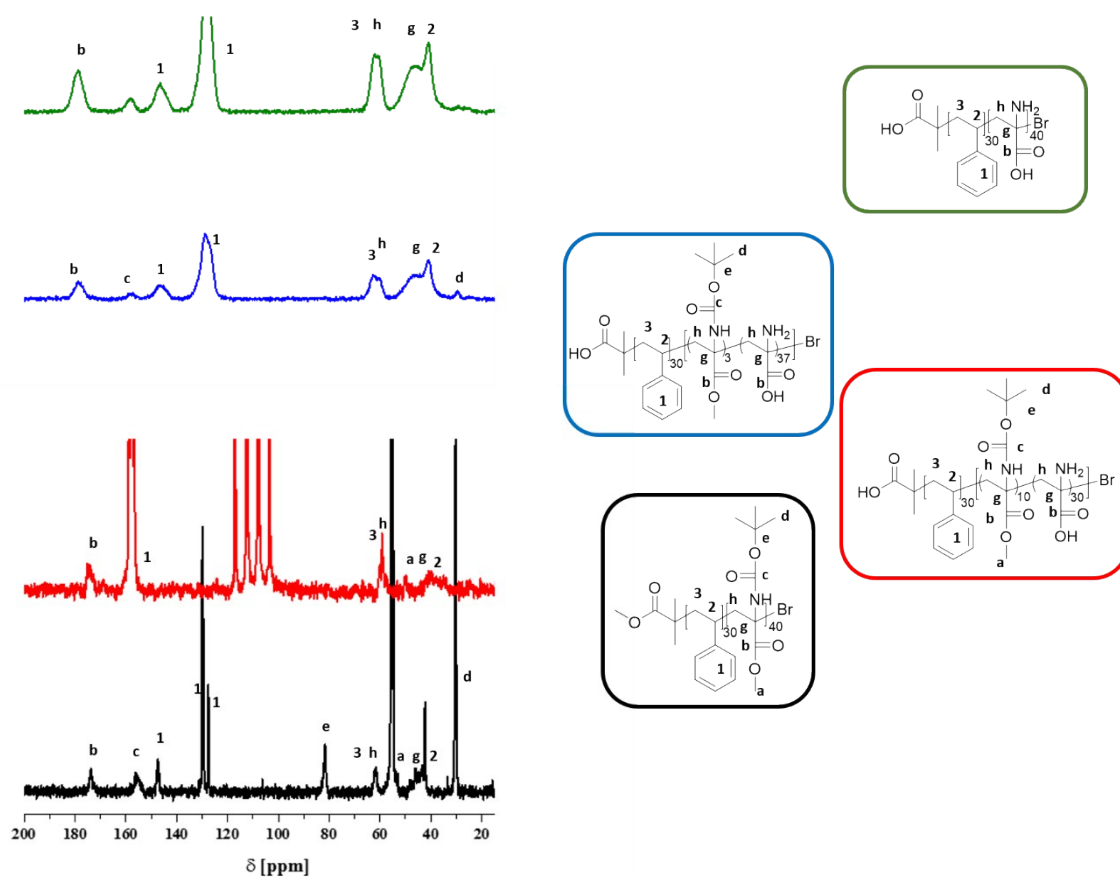

Figure S8:  $^{13}\text{C}$ -NMR of  $\text{PS}_{30}$ -*b*- $\text{PtBAMA}_{40}$  (black line  $\text{CD}_2\text{Cl}_2$ ),  $\text{PS}_{30}$ -*b*-( $\text{PAMA}_{10}$ -*co*- $\text{PDha}_{30}$ ) (red line *d*-TFA),  $\text{PS}_{30}$ -*b*-( $\text{PtBAMA}_3$ -*co*- $\text{PDha}_{37}$ ) (blue line solid state),  $\text{PS}_{30}$ -*b*- $\text{PDha}_{40}$  (green line solid state) with < 10% remaining *boc*-group (159 ppm).
